# Supplementary material for: Early plasma circulating tumor DNA (ctDNA) changes predict response to first-line pembrolizumab-based therapy in non-small cell lung cancer (NSCLC)
Source: PubMed Central journal article supplement — J Immunother Cancer. 2021 Mar 25;9(3):e001504. doi: 10.1136/jitc-2020-001504 (PMC7996662; doi:10.1136/jitc-2020-001504), 2021-03-25
Supplement: jitc-2020-001504supp001.pdf [file jitc-2020-001504supp001.pdf]

**Supplementary Table 1.** Baseline clinicopathologic characteristics of the 62 patients with NSCLC treated with immunotherapy.

| Characteristic                                        | N = 62 (%)     |
|-------------------------------------------------------|----------------|
| Age, median (range)                                   | 61.5 (39-89)   |
| Sex:                                                  |                |
| Male                                                  | 25 (40.3)      |
| Female                                                | 37 (59.7)      |
| Smoking status:                                       |                |
| Ever                                                  | 53 (85.5)      |
| Never                                                 | 9 (14.5)       |
| ECOG performance status:                              |                |
| 0-1                                                   | 55 (88.7)      |
| ≥2                                                    | 7 (11.3)       |
| Histology:                                            |                |
| Non-squamous                                          | 56 (90.3)      |
| Squamous                                              | 6 (9.7)        |
| Mutation status by tissue next generation sequencing: |                |
| <i>KRAS</i>                                           | 21 (35.0)      |
| <i>EGFR</i>                                           | 4 (6.6)        |
| <i>BRAF</i>                                           | 6 (10.0)       |
| <i>MET exon 14</i>                                    | 2 (3.3)        |
| <i>HER2</i>                                           | 2 (3.3)        |
| <i>ALK</i>                                            | 1 (1.6)        |
| <i>ROS1</i>                                           | 1 (1.6)        |
| None identified                                       | 23 (38.3)      |
| Not assessed                                          | 2              |
| Treatment received:                                   |                |
| Carboplatin/Pemetrexed/Pembrolizumab                  | 31 (50.0)      |
| Pembrolizumab                                         | 31 (50.0)      |
| PD-L1 tumor proportion score:                         |                |
| <1%                                                   | 13 (23.2)      |
| 1-49%                                                 | 10 (17.8)      |
| ≥50%                                                  | 33 (58.9)      |
| Not assessed                                          | 6              |
| TMB, median (range), mutations/megabase               | 9.8 (1.5-41.8) |

ECOG, Eastern Cooperative Oncology Group  
 PD-L1, programmed death ligand 1  
 TMB, tumor mutational burden.
