# Supplementary material for: Early plasma circulating tumor DNA (ctDNA) changes predict response to first-line pembrolizumab-based therapy in non-small cell lung cancer (NSCLC)
Source: PubMed Central journal article supplement — J Immunother Cancer. 2021 Mar 25;9(3):e001504. doi: 10.1136/jitc-2020-001504 (PMC7996662; doi:10.1136/jitc-2020-001504), 2021-03-25
Supplement: jitc-2020-001504supp002.pdf [file jitc-2020-001504supp002.pdf]

**Supplementary Table 2.** Concordance between plasma NGS and tissue molecular analysis.

| DFCI ID | Mutation identified from ctDNA                         | Plasma Allele Fraction (%)       | Tissue NGS                                     |
|---------|--------------------------------------------------------|----------------------------------|------------------------------------------------|
| DFCI1   | TP53 R283P                                             | 0.18072                          | Identified                                     |
| DFCI2   | BRAF V600E                                             | 1.71642                          | Identified                                     |
| DFCI3   | HER2 V777_G778insGSP<br>TP53 G244C                     | 9.3875<br>14.575                 | Identified<br>Identified                       |
| DFCI4   | TP53 V216L<br>CDKN2A H83Pfs63*                         | 1.8871<br>0.45161                | Identified<br>Identified                       |
| DFCI5   | KRAS G12C<br>TP53 A159V<br>TP53 T211A                  | 12.19844<br>0.40856<br>1.4786    | Identified<br>Identified<br>Not identified     |
| DFCI6   | KRAS G12C<br>TP53 Q104*<br>CTNNB1 D32Y                 | 3.74375<br>0.89375<br>0.04375    | Identified<br>Identified<br>Not identified     |
| DFCI7   | TP53 G105R<br>TP53 R248Q<br>TP53 97:V/X                | 34.38679<br>0.4717<br>0.16509    | Not performed                                  |
| DFCI8*  | KRAS G12C                                              | 0.09766                          | Identified                                     |
| DFCI9*  | KRAS G12C<br>TP53 R196*                                | 7.13235<br>3.82353               | Identified<br>Identified                       |
| DFCI10  | KRAS G12C                                              | 0.15411                          | Identified                                     |
| DFCI11  | NRAS G12D                                              | 0.19231                          | Not performed                                  |
| DFCI12  | KRAS G12R                                              | 1.13281                          | Identified                                     |
| DFCI13  | TP53 R175H                                             | 0.58442                          | Not identified                                 |
| DFCI14* | KRAS G12A<br>TP53 V274F<br>STK11 E223*                 | 25.04132<br>14.21488<br>25.28926 | Identified<br>Not reported<br>Not reported     |
| DFCI15  | KRAS G12V<br>NTRK1 M671I                               | 0.11968<br>0.05319               | Identified<br>Not identified                   |
| DFCI16  | KRAS G12S<br>ESR Q314H<br>TP53 Splice Acceptor Variant | 11.5625<br>3.78024<br>4.41532    | Identified<br>Identified<br>Identified         |
| DFCI17  | NRAS G12A                                              | 10.85                            | Not identified                                 |
| DFCI18  | TP53 Y205D                                             | 0.17241                          | Not performed                                  |
| DFCI19  | AKT1 E17K<br>BRAF K601N<br>TP53 E285K                  | 1.82731<br>1.78715<br>0.64257    | Not identified<br>Not identified<br>Identified |
| DFCI20  | BRAF V600E                                             | 0.36875                          | Identified                                     |
| DFCI21  | EGFR H773_774dup<br>TP53 P278L                         | 29.75<br>28.07955                | Identified<br>Identified                       |
| DFCI22  | FGFR2 L551H                                            | 0.70                             | Not identified                                 |
| DFCI23  | EGFR L858R<br>TP53 P177R<br>TP53 A159P                 | 19.9125<br>8.5375<br>0.8         | Identified<br>Identified<br>Not identified     |

|         |                                                                         |                                          |                                                                  |
|---------|-------------------------------------------------------------------------|------------------------------------------|------------------------------------------------------------------|
| DFCI24  | TP53 205:Y/YX<br>TP53 LD206-207FY<br>ALK V1265E                         | 38.25<br>38.025<br>20.60625              | Not identified<br>Not identified<br>Identified                   |
| DFCI25  | KRAS Q61H<br>TP53 Splice Acceptor Variant                               | 1.7561<br>0.09756                        | Identified<br>Not identified                                     |
| DFCI26  | BRAF L597Q<br>STK11 Splice Acceptor Variant                             | 15.88643<br>0.70637                      | Not performed                                                    |
| DFCI27  | TP53 R248Q                                                              | 10.475                                   | Identified                                                       |
| DFCI28  | TP53 R283P                                                              | 0.39683                                  | Identified                                                       |
| DFCI29  | TP53 P152L                                                              | 0.84016                                  | Not performed                                                    |
| DFCI30  | TP53 Y220C<br>KRAS G12C                                                 | 0.96<br>0.70                             | Identified<br>Identified                                         |
| DFCI31  | BRAF V600E                                                              | 0.41667                                  | Identified                                                       |
| DFCI32  | KRAS A146V<br>MAP2K1 G128D                                              | 3.7312<br>2.72556                        | Identified<br>Identified                                         |
| DFCI33  | HER2 D769H                                                              | 0.09375                                  | Not identified                                                   |
| DFCI34  | KRAS G12C<br>TP53 V272M<br>TP53 S241P<br>U2AF1 Q157R                    | 0.33133<br>0.60241<br>7.53012<br>5.96386 | Identified<br>Not identified<br>Not identified<br>Not identified |
| DFCI35  | KRAS G12D<br>TP53 E224D                                                 | 2.10568<br>0.44164                       | Identified<br>Identified                                         |
| DFCI36  | MAP2K1 K57N                                                             | 0.125                                    | Identified                                                       |
| DFCI37  | KRAS G12C                                                               | 3.06391                                  | Identified                                                       |
| DFCI38  | PTEN Q171*<br>TP53 Splice Acceptor Variant<br>TP53 L145P<br>CDKN2A R80* | 0.77778<br>0.66667<br>0.4127<br>0.38095  | Identified<br>Identified<br>Identified<br>Identified             |
| DFCI39  | KRAS G12C                                                               | 2.83991                                  | Identified                                                       |
| DFCI40* | KRAS G12C                                                               | 0.21154                                  | Identified                                                       |
| DFCI41  | TP53 C275F<br>TP53 Y107D                                                | 0.27027<br>19.86486                      | Not identified<br>Not identified                                 |
| DFCI42  | TP53 G374Vfs*48                                                         | 67.9                                     | Identified                                                       |
| DFCI43  | TP53 C277Y<br>TP53 Y220C                                                | 4.59205<br>0.46025                       | Not identified<br>Not identified                                 |
| DFCI44* | KRAS G12A<br>STK11 E130*                                                | 0.58468<br>0.32258                       | Identified<br>Identified                                         |
| DFCI45  | KRAS G12C<br>CTNNB1 S37F                                                | 0.74236<br>0.79694                       | Identified<br>Identified                                         |

\* Denotes cases that underwent tissue molecular analysis at an outside institution. All other cases underwent tissue next generation sequencing by OncoPanel at DFCI.
