# Supplementary material for: Early plasma circulating tumor DNA (ctDNA) changes predict response to first-line pembrolizumab-based therapy in non-small cell lung cancer (NSCLC)
Source: PubMed Central journal article supplement — J Immunother Cancer. 2021 Mar 25;9(3):e001504. doi: 10.1136/jitc-2020-001504 (PMC7996662; doi:10.1136/jitc-2020-001504), 2021-03-25
Supplement: jitc-2020-001504supp005.pdf [file jitc-2020-001504supp005.pdf]

## Supplementary Figure 3

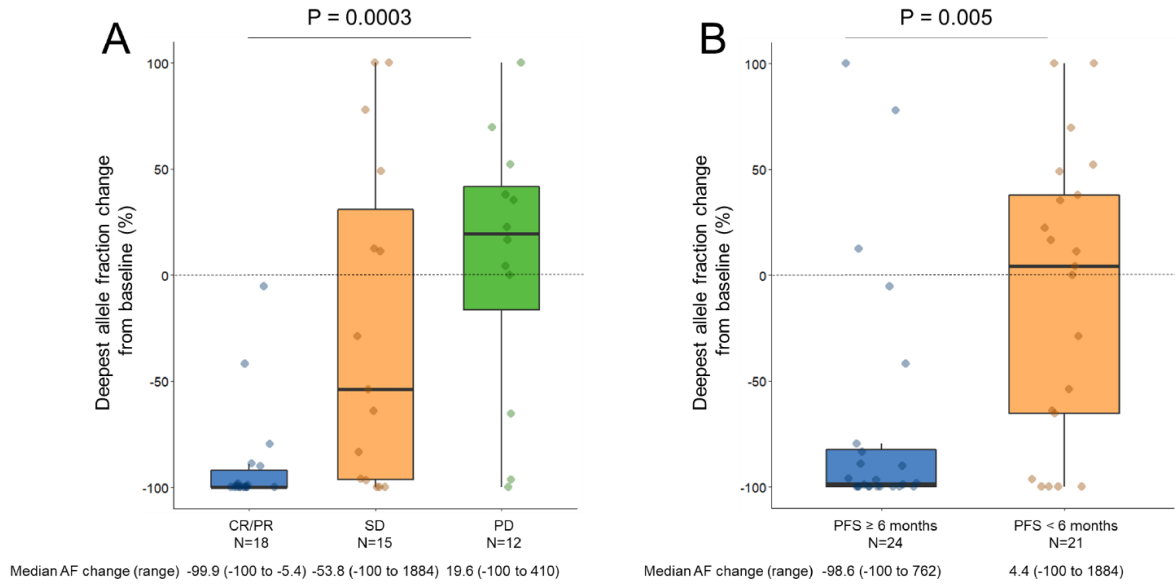

(A) Deepest plasma allele fraction change at first follow-up according to the best response to pembrolizumab +/-chemotherapy. (B) Deepest plasma allele fraction change in patients with a PFS of  $\geq 6$  months versus <6 months to pembrolizumab +/-chemotherapy. Y axis is truncated at 100%. AF, allele fraction.
