# Supplementary material for: Early plasma circulating tumor DNA (ctDNA) changes predict response to first-line pembrolizumab-based therapy in non-small cell lung cancer (NSCLC)
Source: PubMed Central journal article supplement — J Immunother Cancer. 2021 Mar 25;9(3):e001504. doi: 10.1136/jitc-2020-001504 (PMC7996662; doi:10.1136/jitc-2020-001504), 2021-03-25
Supplement: jitc-2020-001504supp008.pdf [file jitc-2020-001504supp008.pdf]

## Supplementary Figure 6

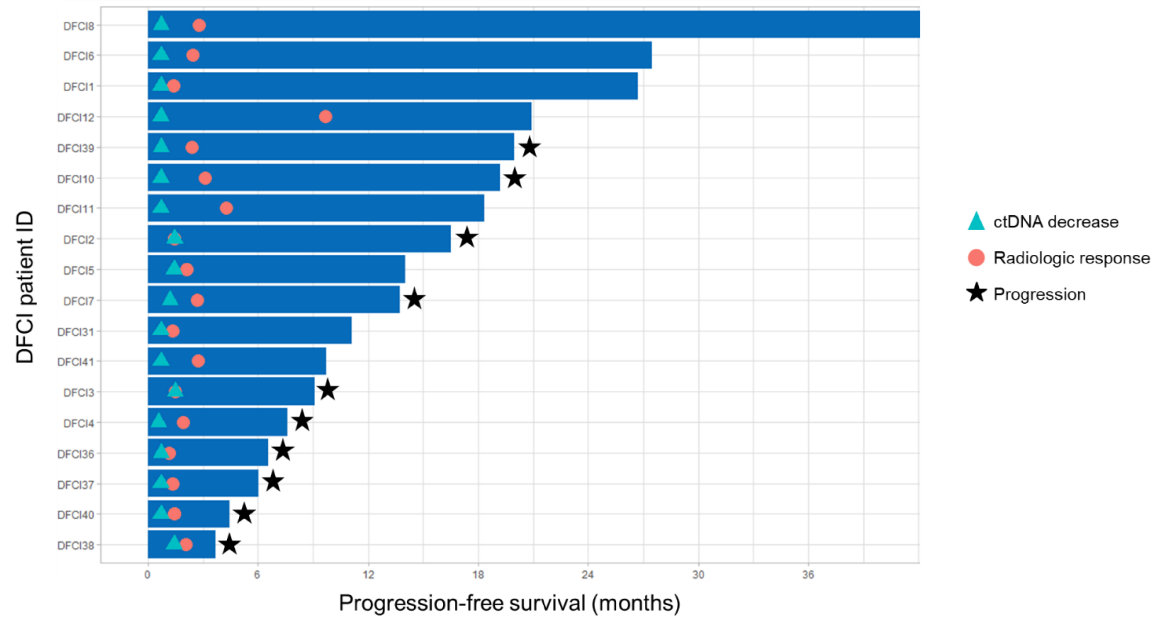

Swimmer plot showing the progression-free survival (horizontal blue bars), the time to ctDNA decrease (light blue triangle), and the time to response (red circle) among patients treated with pembrolizumab +/- chemotherapy.
