# Supplementary material for: Early plasma circulating tumor DNA (ctDNA) changes predict response to first-line pembrolizumab-based therapy in non-small cell lung cancer (NSCLC)
Source: PubMed Central journal article supplement — J Immunother Cancer. 2021 Mar 25;9(3):e001504. doi: 10.1136/jitc-2020-001504 (PMC7996662; doi:10.1136/jitc-2020-001504), 2021-03-25
Supplement: jitc-2020-001504supp009.pdf [file jitc-2020-001504supp009.pdf]

**Supplementary Table 3.** Multivariable analysis for objective response, progression-free and overall survival among patients with detectable ctDNA at baseline.

| <b>Objective response</b>              |                  |         |
|----------------------------------------|------------------|---------|
|                                        | OR (95%CI)       | P       |
| ctDNA change<br>(decrease vs increase) | 2.82 (1.7-5.3)   | 0.01    |
| <b>Progression-free survival</b>       |                  |         |
|                                        | HR (95%CI)       | P       |
| ctDNA change<br>(decrease vs increase) | 0.28 (0.10-0.81) | 0.02    |
| <b>Overall survival</b>                |                  |         |
|                                        | HR (95%CI)       | P       |
| ctDNA change<br>(decrease vs increase) | 0.44 (0.31-0.64) | <0.0001 |

Covariates included in the model: plasma cDNA change, age, Eastern Cooperative Oncology Group performance status, PD-L1 expression, sex, treatment received, smoking status.

ctDNA: circulating tumor DNA
