# Supplementary material for: Early plasma circulating tumor DNA (ctDNA) changes predict response to first-line pembrolizumab-based therapy in non-small cell lung cancer (NSCLC)
Source: PubMed Central journal article supplement — J Immunother Cancer. 2021 Mar 25;9(3):e001504. doi: 10.1136/jitc-2020-001504 (PMC7996662; doi:10.1136/jitc-2020-001504), 2021-03-25
Supplement: jitc-2020-001504supp011.pdf [file jitc-2020-001504supp011.pdf]

## Supplementary Figure 8

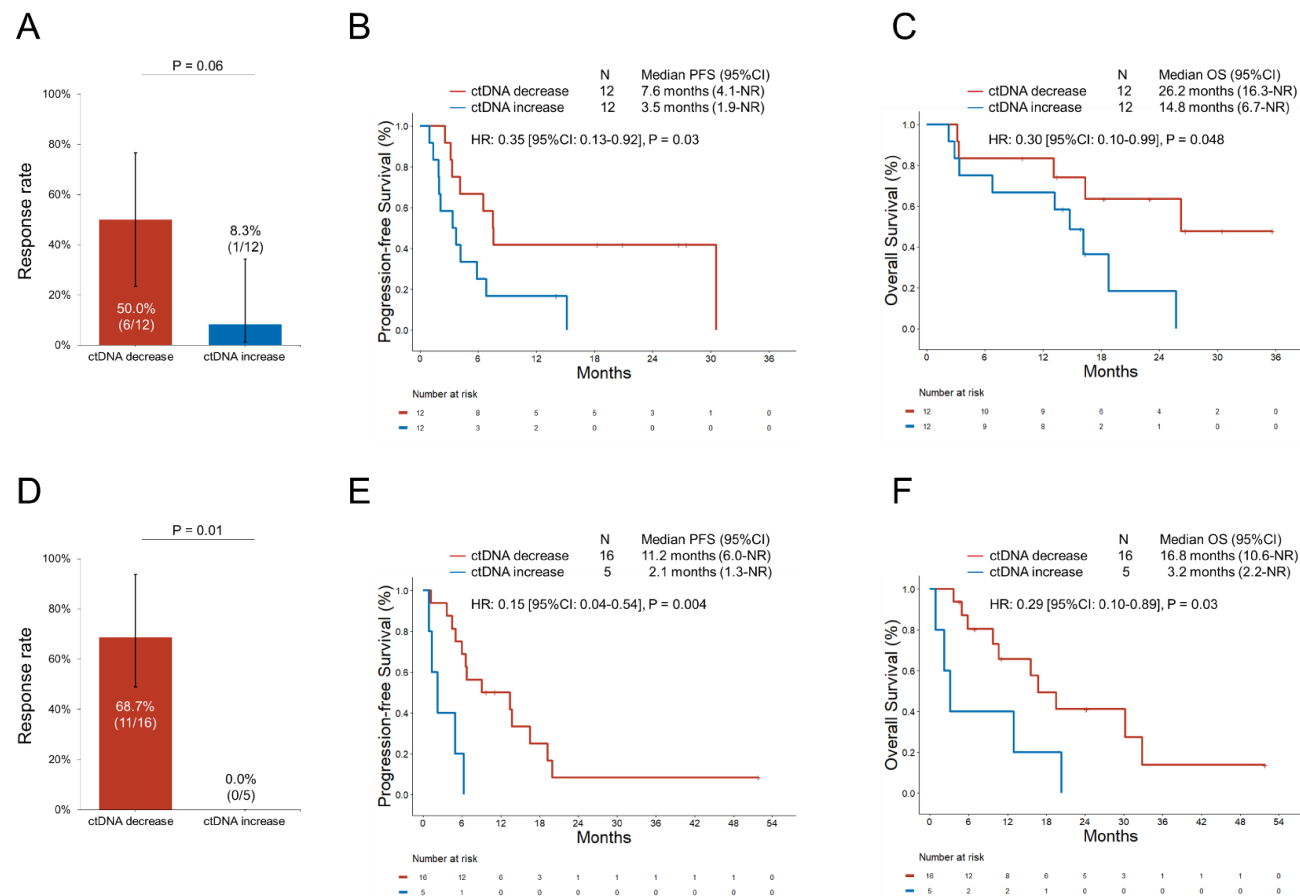

(A) Objective response rate, (B) progression-free, and (C) overall survival to pembrolizumab monotherapy by ctDNA decrease versus increase. (D) Objective response rate, (E) progression-free, and (F) overall survival to pembrolizumab + chemotherapy by ctDNA decrease versus increase.
